# Supplementary material for: Pluripotent stem cells related to embryonic disc exhibit common self-renewal requirements in diverse livestock species
Source: PubMed Central journal article supplement (PMC8714072; doi:10.1242/dev.199901), 2021-12-07
Supplement: develop-148-199901-s1.pdf [file develop-148-199901-s1.pdf]

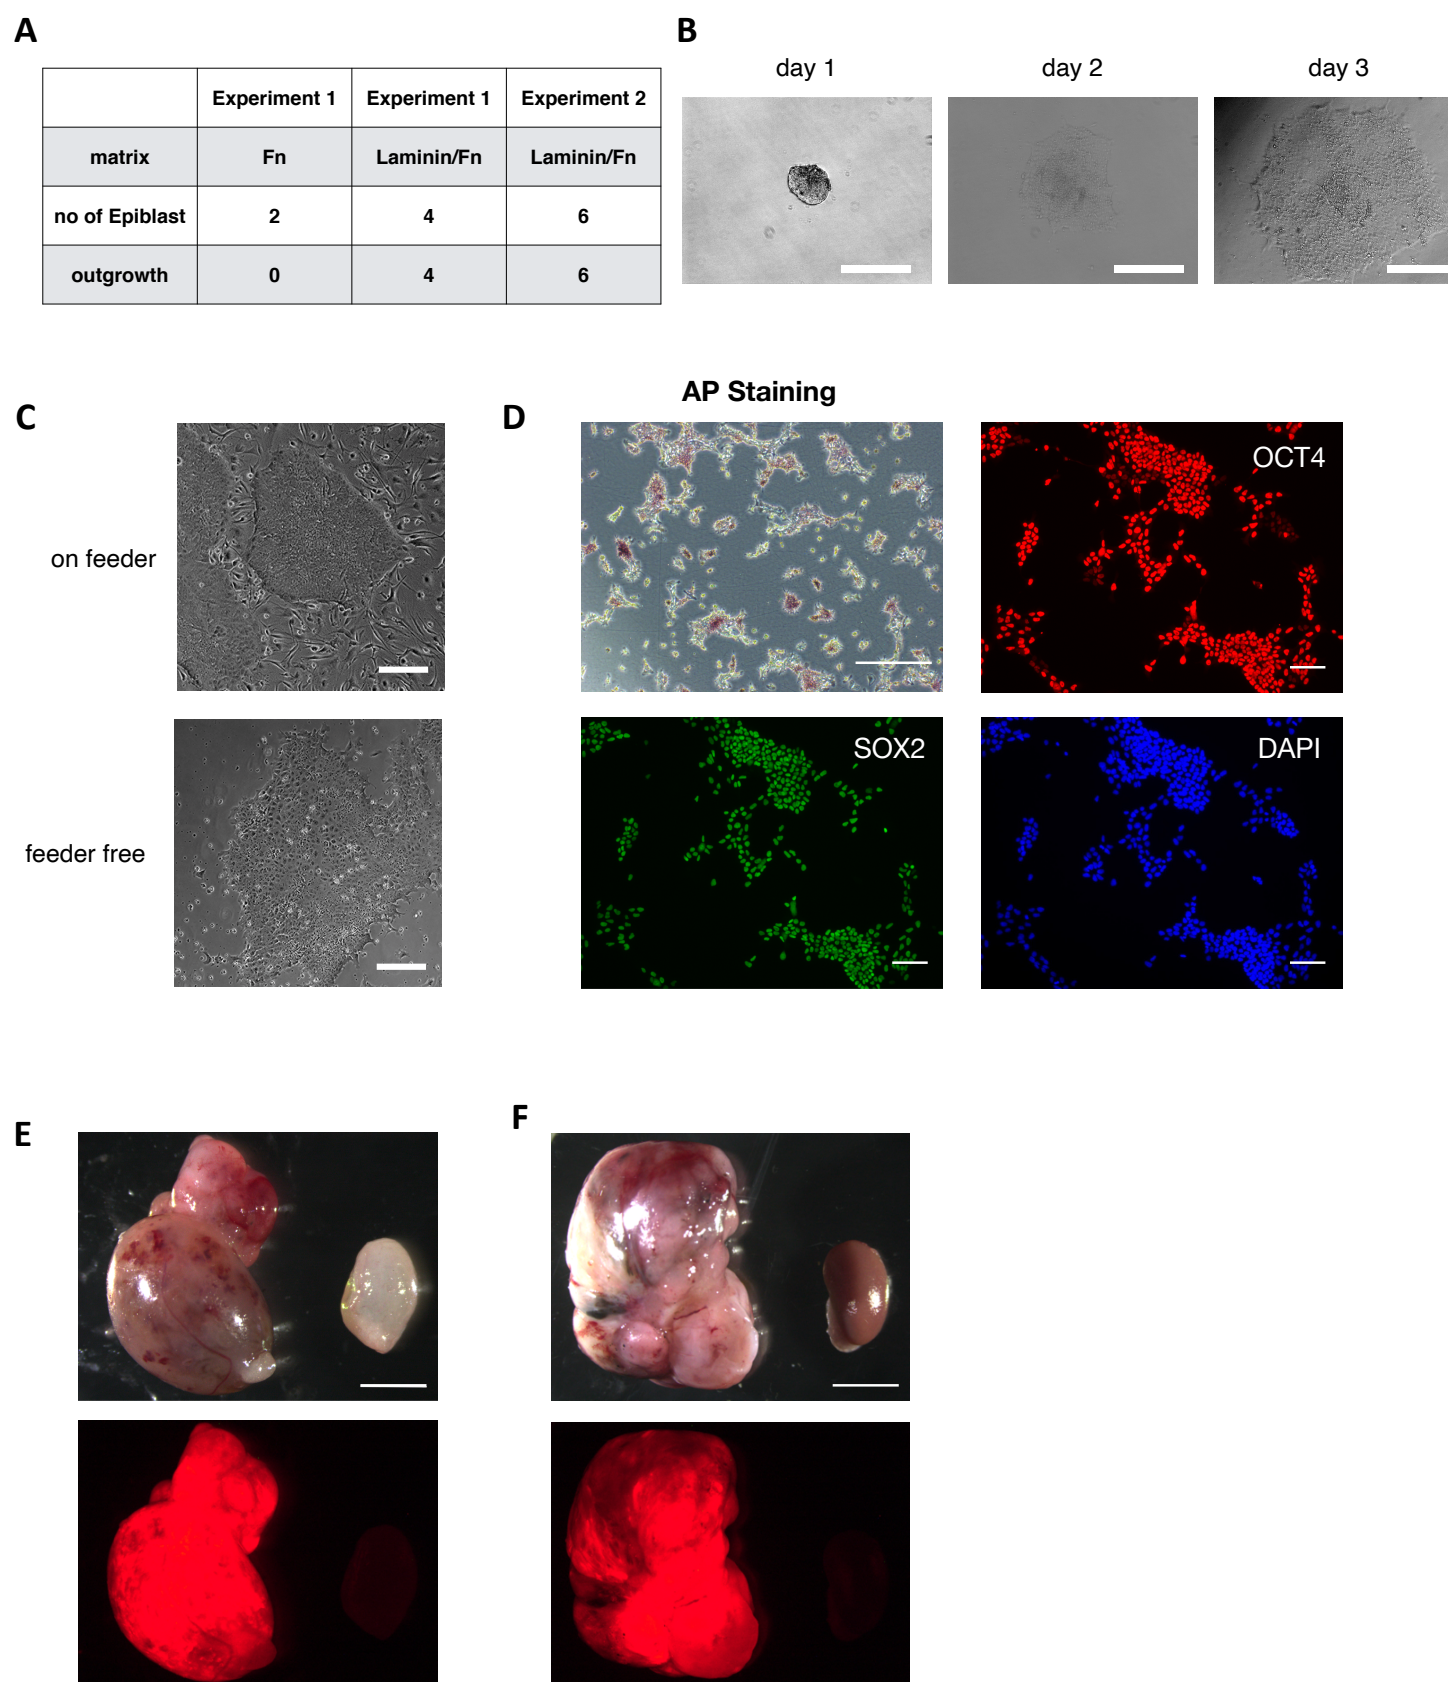

**Fig. S1. Related to Fig. 1.**

(A) Summary of derivation from E11 pig embryos. (B) E11 epiblast outgrowth over the initial three days after plating. Scale bars, 500  $\mu$ m. (C) Higher magnification images of pig AFX cells. Epiblast-derived cultures established on feeders adapt to culture in AFX without feeders within 5 passages. Scale bar, 200  $\mu$ m. (D) Pig AFX cells cultured in porcupine inhibitor IWP-2 instead of tankyrase inhibitor XAV939 for one passage (4 days in total), as in Fig. 1C. Scale bars: AP staining, 500  $\mu$ m; immunofluorescence images, 100  $\mu$ m. (E, F) Teratomas generated from pig AFX cells in testis (E) and kidney capsule (F). Scale bars, 5mm.

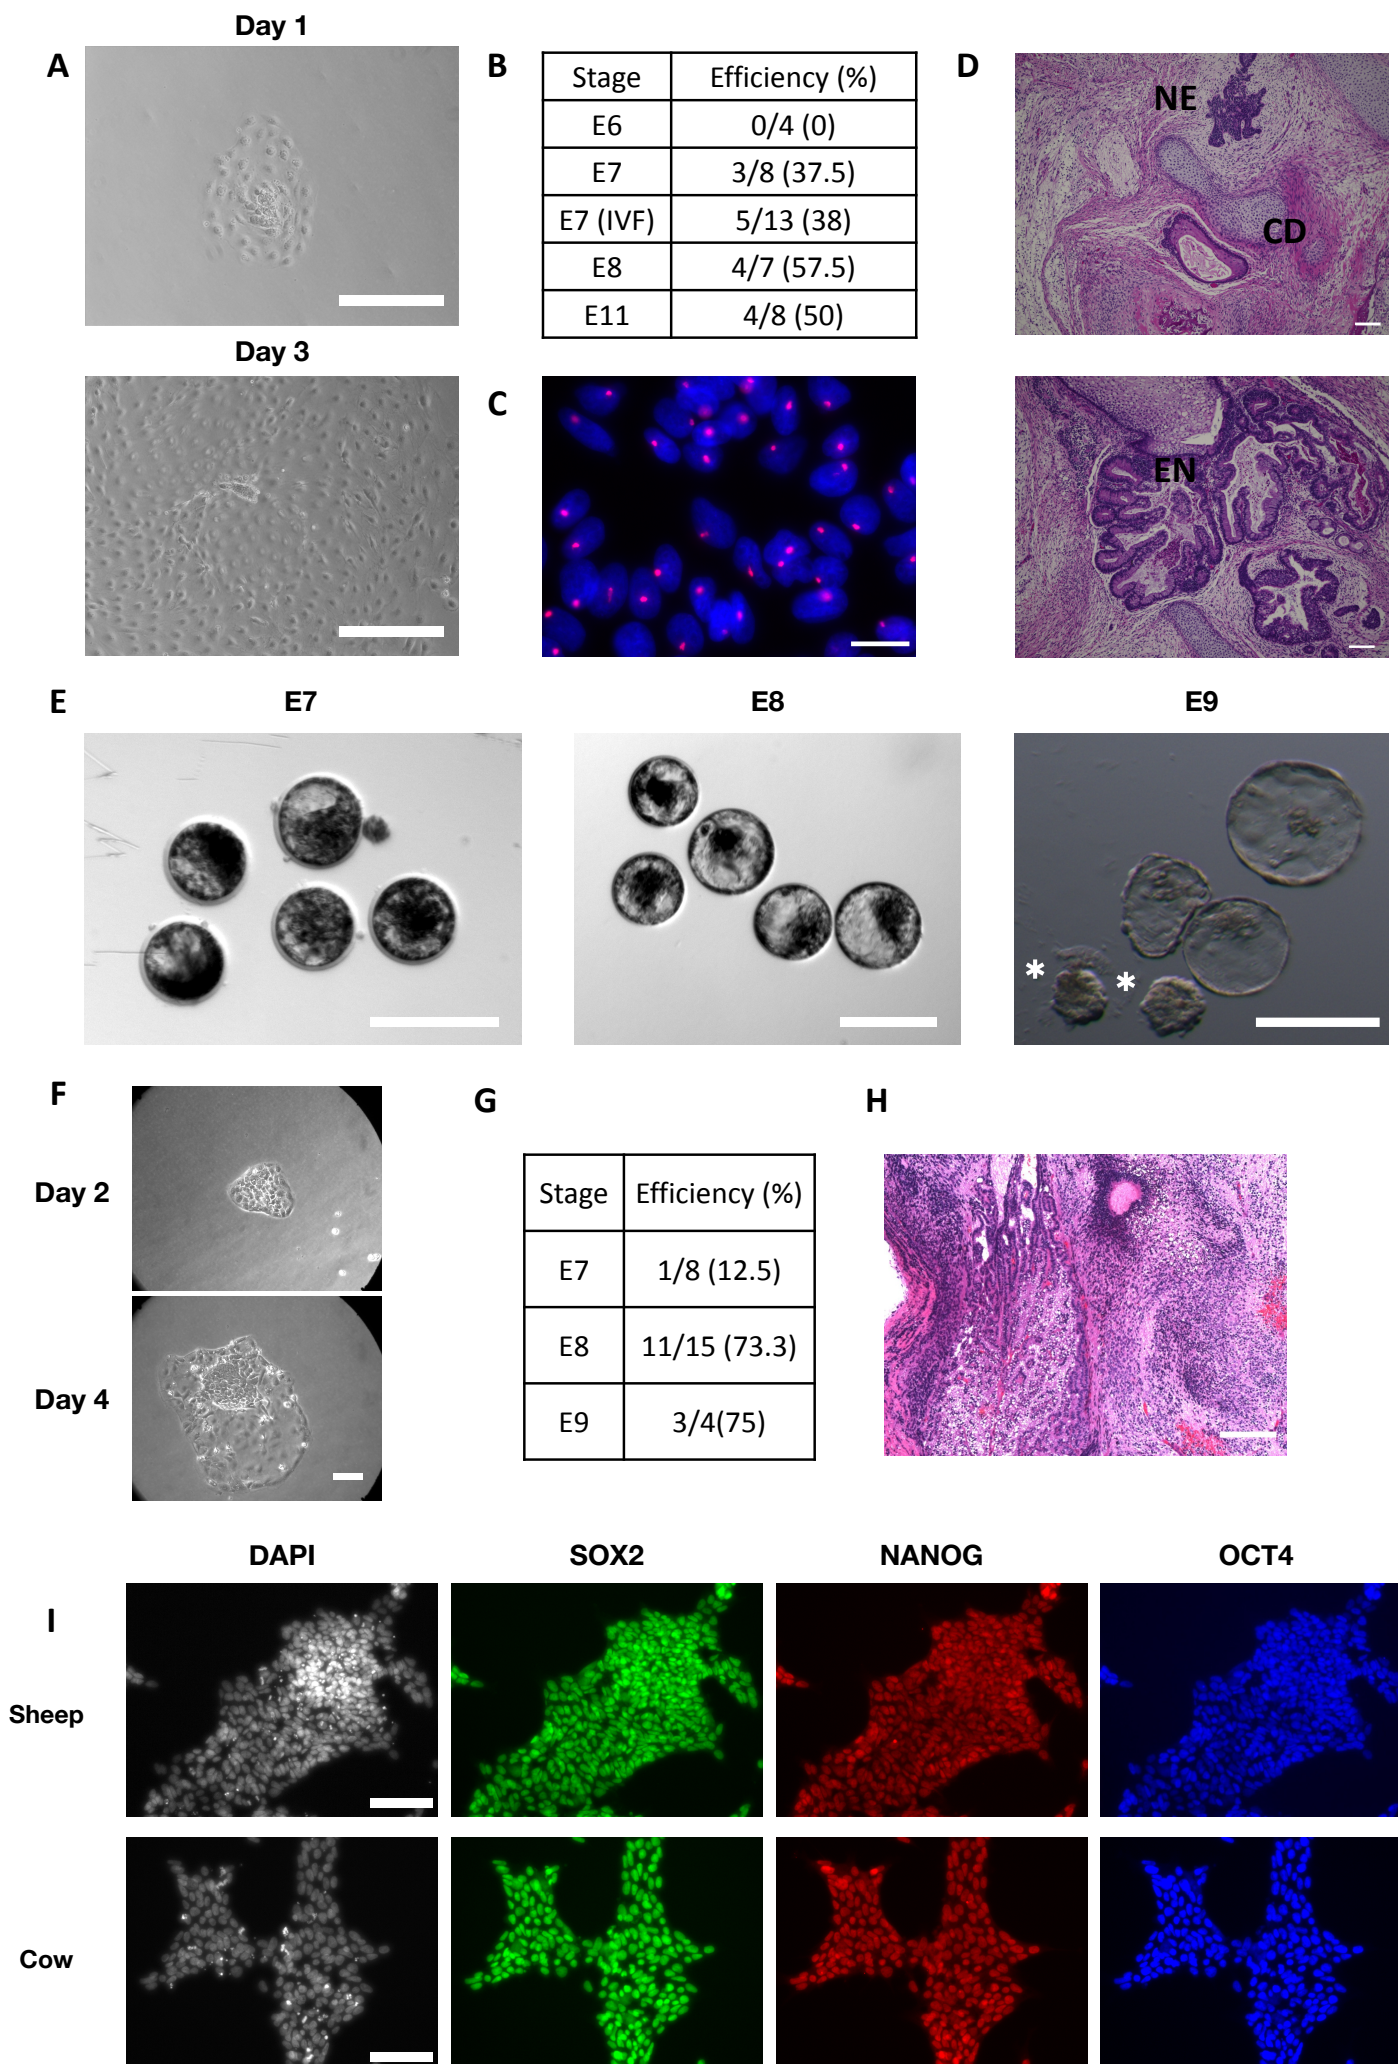**Fig. S2. Related to Fig. 2**

(A) Sheep ICM outgrowth. Cultures were dominated by differentiated cells by day 3. Scale bars, 250  $\mu$ m. (B) Summary of sheep AFX cell derivation from different developmental stages. (C) H3K27me3 staining (red) of female sheep AFX cells. DAPI in blue. Scale bar, 25  $\mu$ m. (D) Teratomas from sheep AFX cells sectioned and stained with hematoxylin and eosin. Scale bars, 100 $\mu$ m. NE; neuroepithelium, CD; chondrocytes EN; Endoderm epithelium (E) Morphology of in vitro developed bovine blastocysts at E7, 8 and 9. Asterisks mark degenerating embryos. Scale bar, 200  $\mu$ m. (F) Typical ICM outgrowth from bovine E9 blastocyst. Scale bar, 50  $\mu$ m. (G) Summary of bovine AFX cell derivation from different blastocyst stages. (H) Teratoma from bovine AFX cells, stained with hematoxylin and eosin. Scale bar, 200  $\mu$ m. (I) Immunostaining of sheep and cow AFX cells maintained with IWP2 instead of XAV939 for 8 passages. Scale bars, 100  $\mu$ m.

Fig.S3

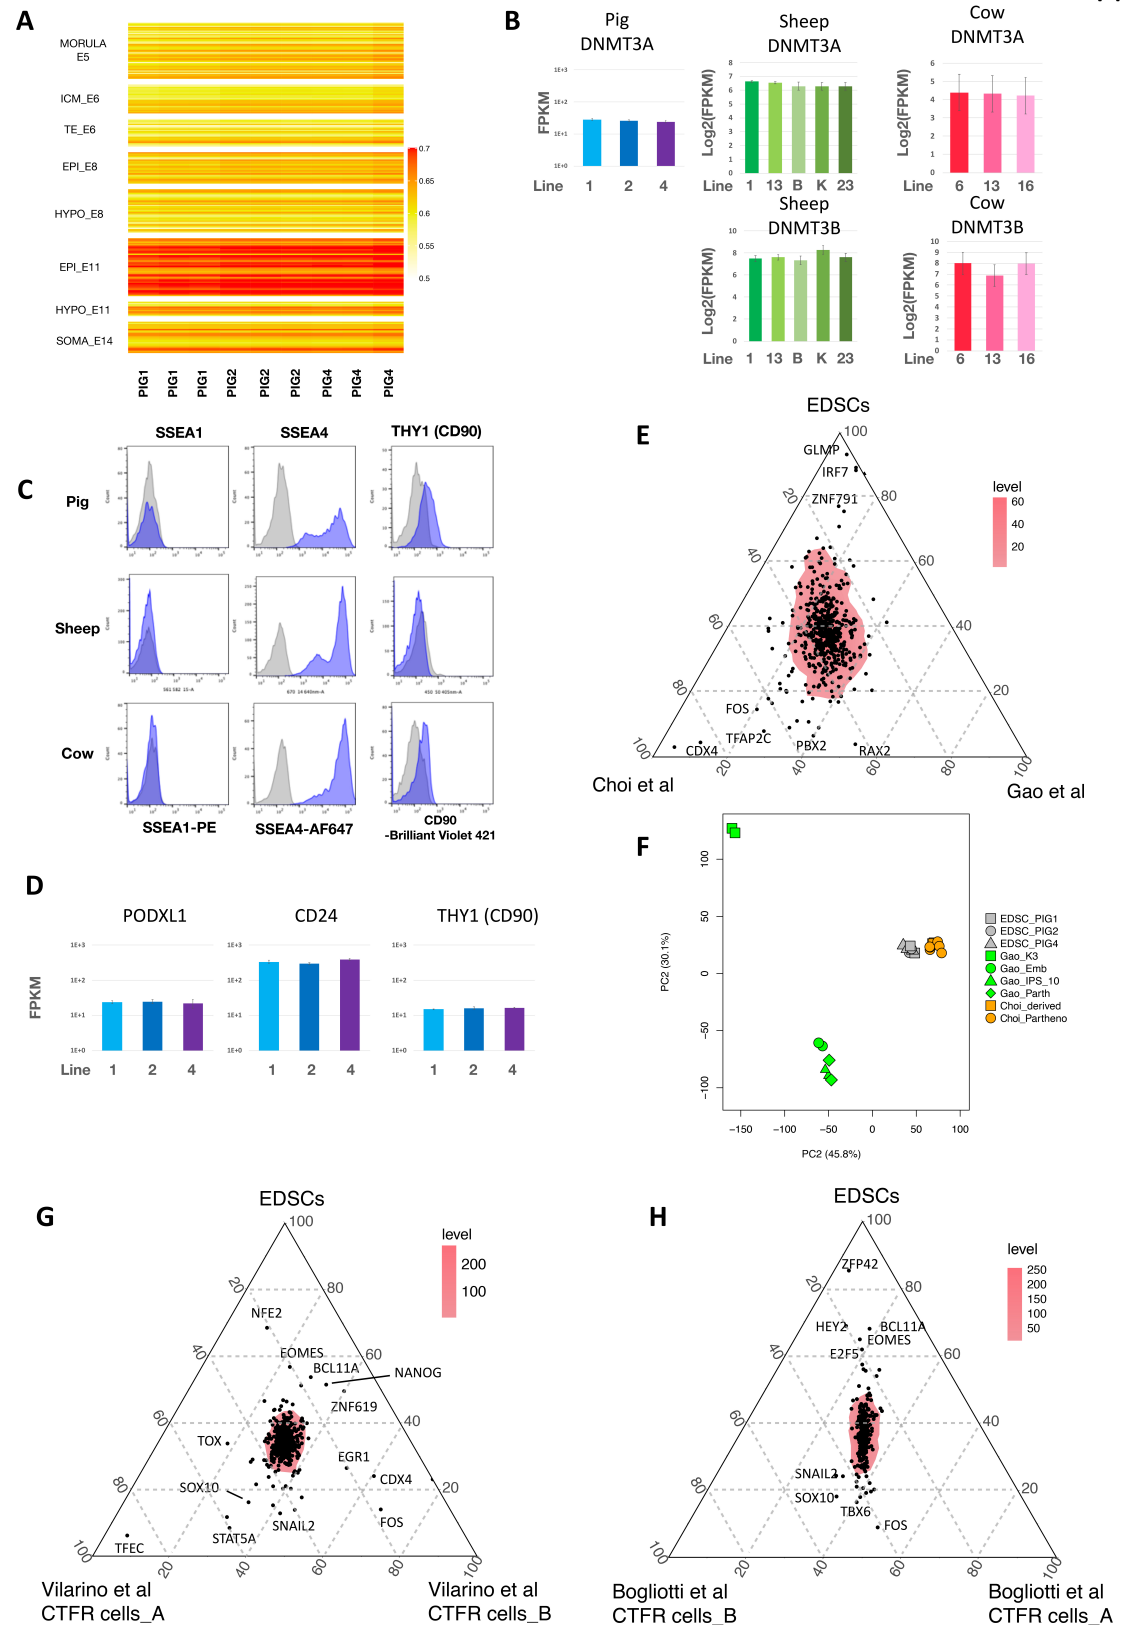

**Fig. S3. Related to Fig. 3**

(A) Heatmap showing Pearson correlation between porcine EDSCs and pig embryo stages for all expressed genes. (B) FPKM values for *DNMT3A* and *DNMT3B* in EDSCs from each species. *DNMT3B* expression in the pig embryo and EDSCs is shown in Fig. 3C. Error bars represent S.D. from triplicates. (C) Flow cytometry analysis of surface marker expression detected with conjugated antibodies. Dark grey peaks are control profiles without antibody and blue peaks are with antibody. (D) Log<sub>2</sub>FPKM values from porcine EDSC RNA-seq for surface protein genes. (E) Ternary plot computed with E11 expressed transcription factor genes (Table S1). (F) PCA using all genes for porcine EDSCs and lines of Choi et al. (2019) and Gao et al. (2019) (G) Ternary plot analysis of sheep EDSCs and two lines of sheep CTFR cells (Vilarino et al., 2020) using highly expressed orthologous transcription factor genes from porcine E11 epiblast. (H) Ternary plot analysis as above for bovine EDSCs and CTFR lines (Bogliotti et al., 2018).

Fig.S4

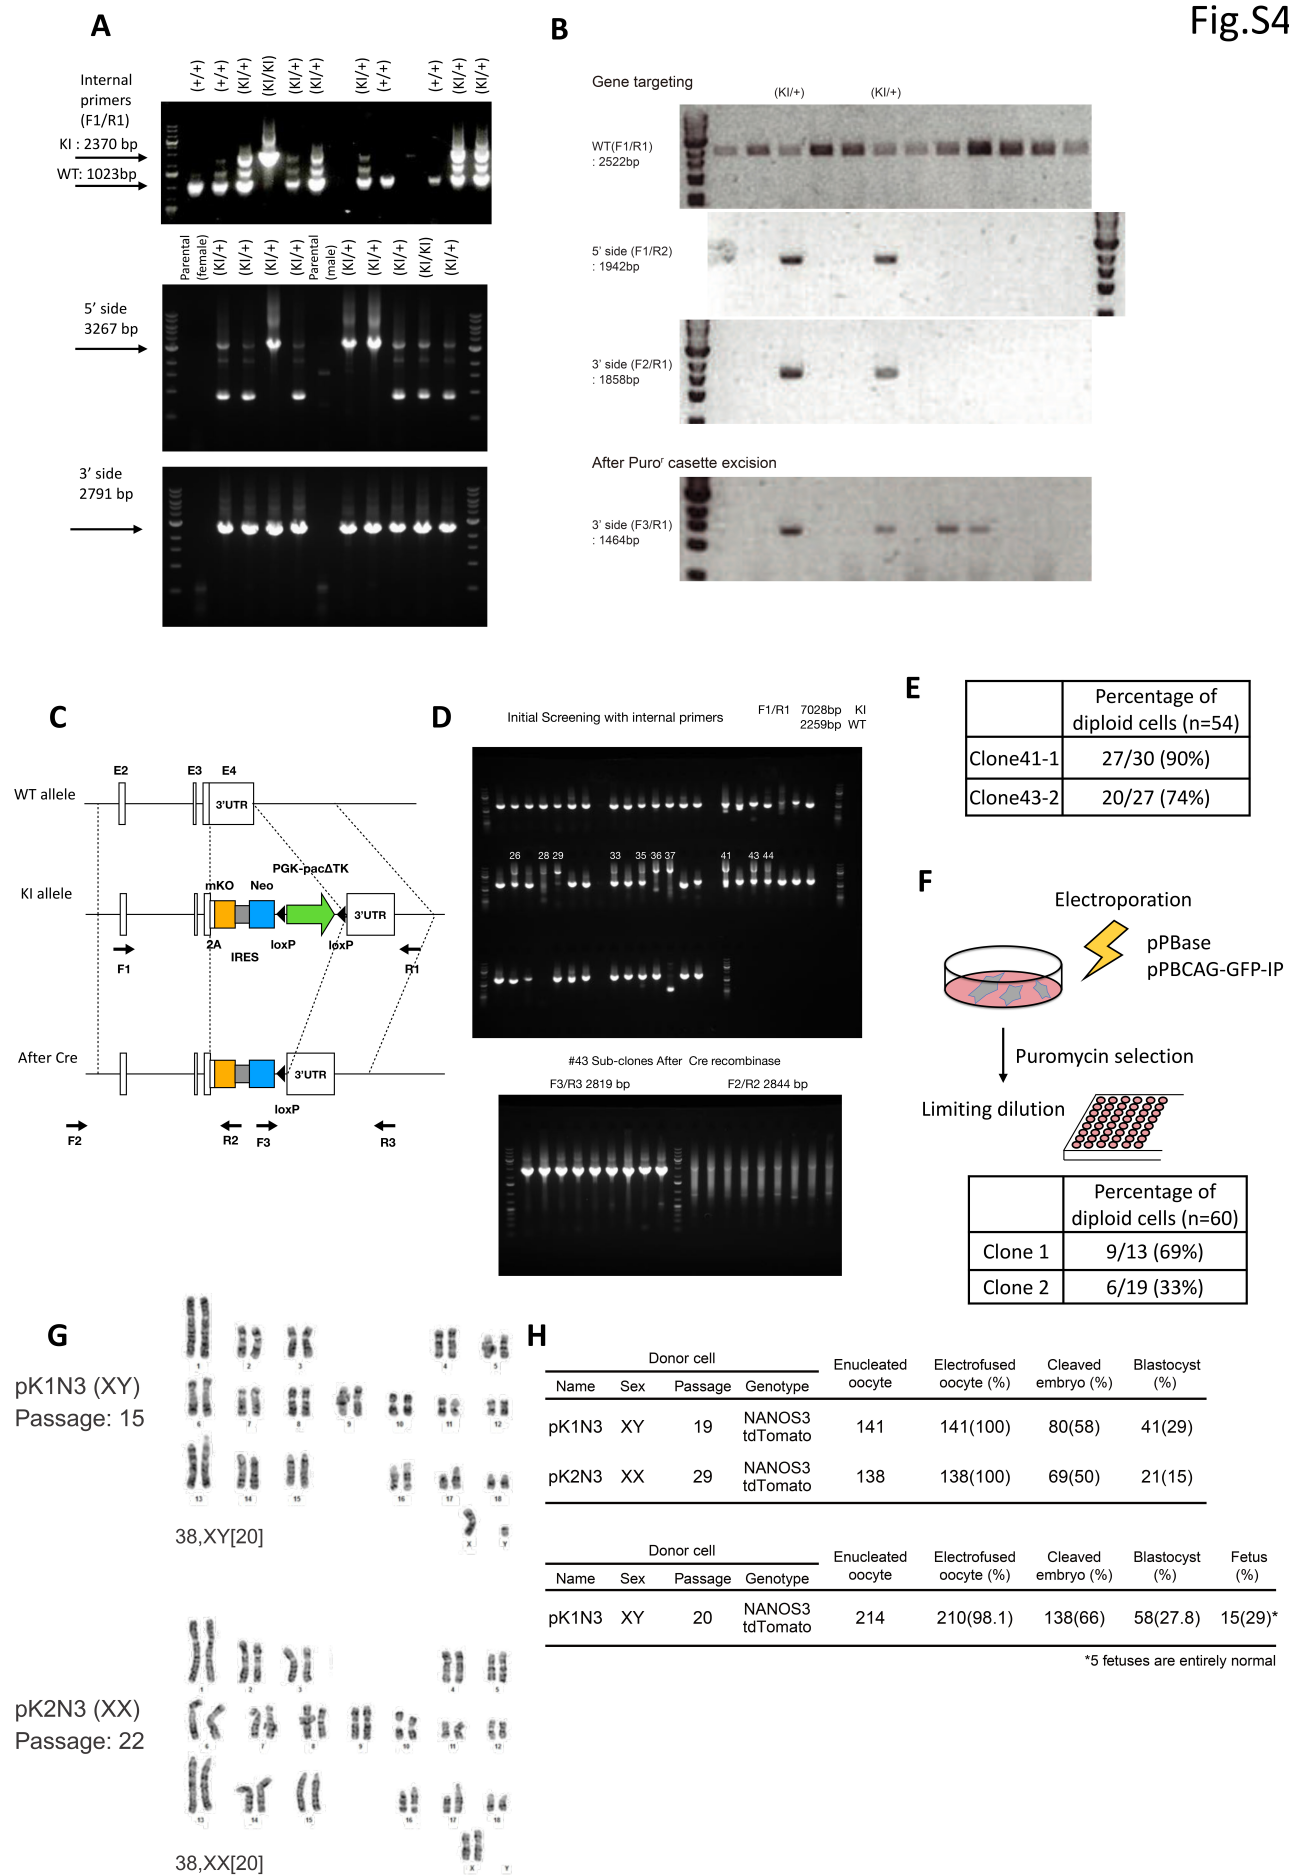

#### Fig. S4. Related to Fig.4

(A) Genomic PCR screening of *NANOG* targeting. Clones were screened for integration using internal primers and targeting was confirmed with primers external to both homology arms. (B) Genomic PCR screening of *NANOS3* targeting. (C) Sheep DPPA3 targeting strategy (D) Genotyping results. Initial screening was performed with primers F1 and R1 (upper gel). After clonal expansion, Cre recombinase was transiently transfected and sub-clones were expanded. The genotyping result for clone #43 sub-clones is presented (bottom gel). (E) Summary of chromosome counts for two sub-clones from two independent targeted clones (#41 and #43). (F) Stable transfection of GFP reporter into bovine EDSCs and clonal expansion. After 7-10 days, 11 GFP colonies showing stem cell morphology were further expanded. Two clones were characterised by metaphase analysis. (G) G-banding analysis of *NANOS3* targeted clones. (H) Summary of cloning experiments.

**Table S1.** List of transcription factor genes used for ternary plots

[Click here to download Table S1](#)

**Table S2.** List of primers

[Click here to download Table S2](#)

**Table S3.** List of antibodies

[Click here to download Table S3](#)
